# Supplementary material for: Activated charcoal modified Ag and Cu-anatase TiO2 for superior photocatalytic degradation of doxycycline under visible-solar light irradiation
Source: Royal Society of Chemistry journal article supplement (doi:10.1039/d6ra00006a), 2026-04-22
Supplement: d6ra00006a1.pdf [file d6ra00006a1.pdf]

## Supplementary Information (SI)

### Activated charcoal modified Ag/Cu-anatase TiO<sub>2</sub> for superior photocatalytic degradation of Doxycycline under visible-solar light irradiation

Kirti Bisht, Davinder Kaur, Bonamali Pal\*

*Department of Chemistry and Biochemistry, Thapar Institute of Engineering and Technology,  
Patiala, Punjab 147004, India*

\*Corresponding author Email: bpal@thapar.edu

#### Materials and methods:

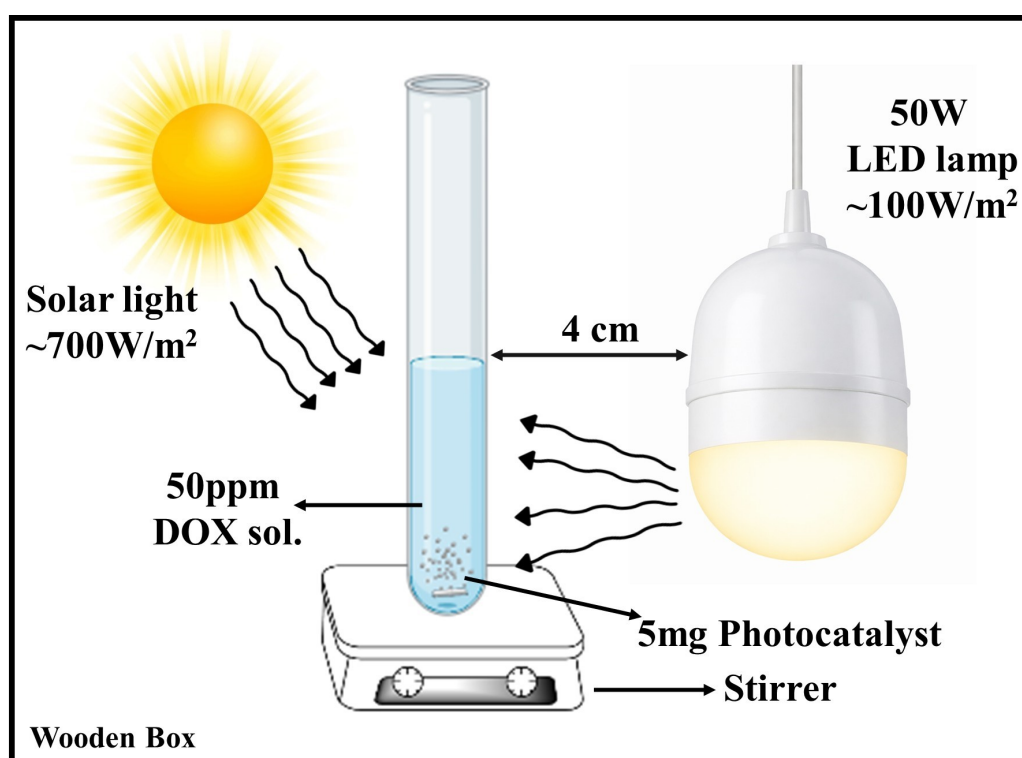

**Fig. S1:** Setup of photodegradation experiment carried out under either Visible light or Solar light irradiation

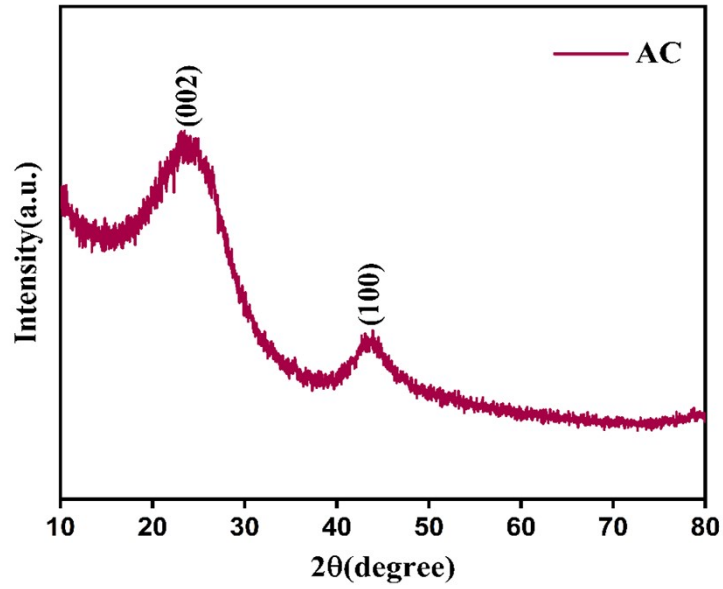

Fig. S2: X-ray diffraction pattern of activated charcoal

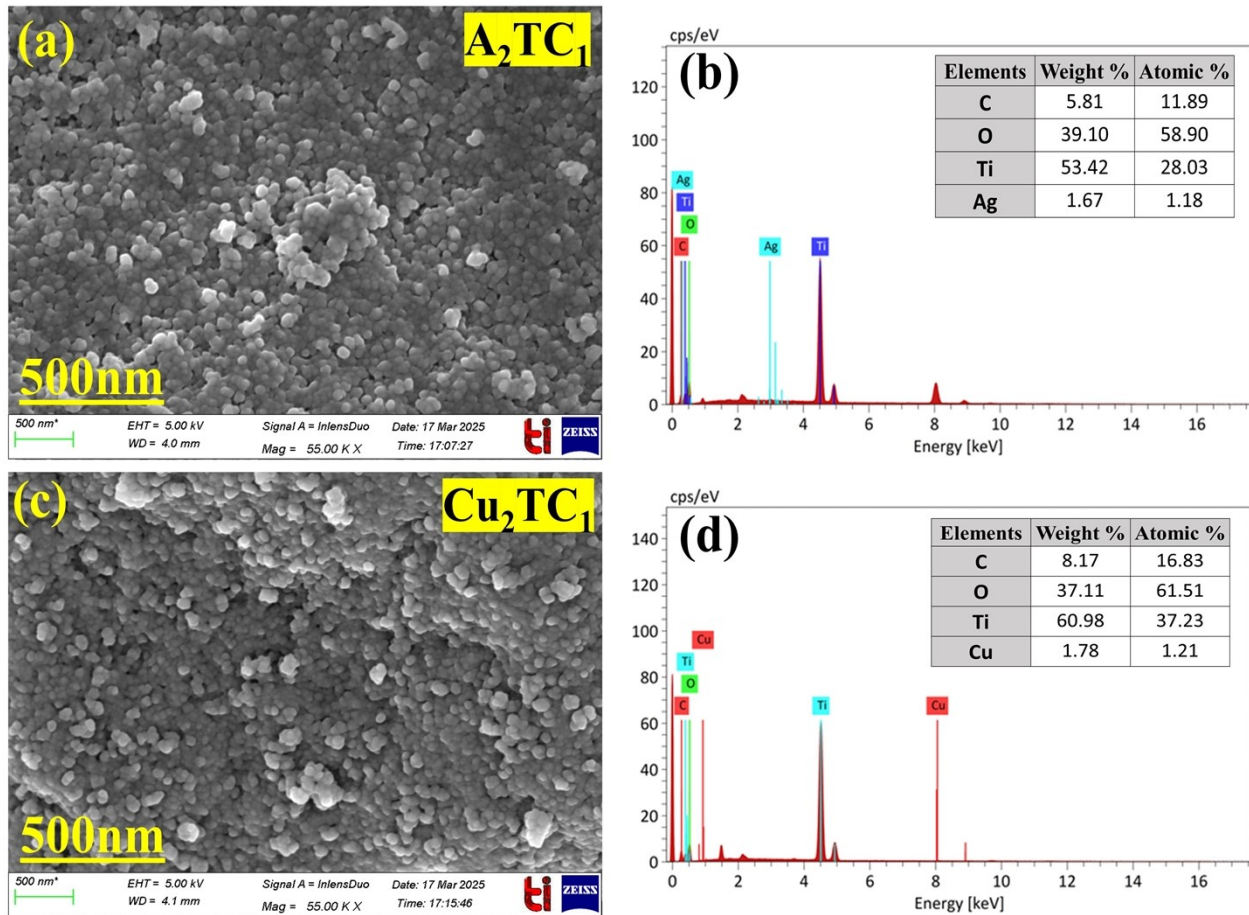

Fig. S3: FESEM images and EDS spectra of (a-b) AC(1wt%)-Ag(2wt%)-TiO<sub>2</sub>, (c-d) AC(1wt%)-Cu(2wt%)-TiO<sub>2</sub>

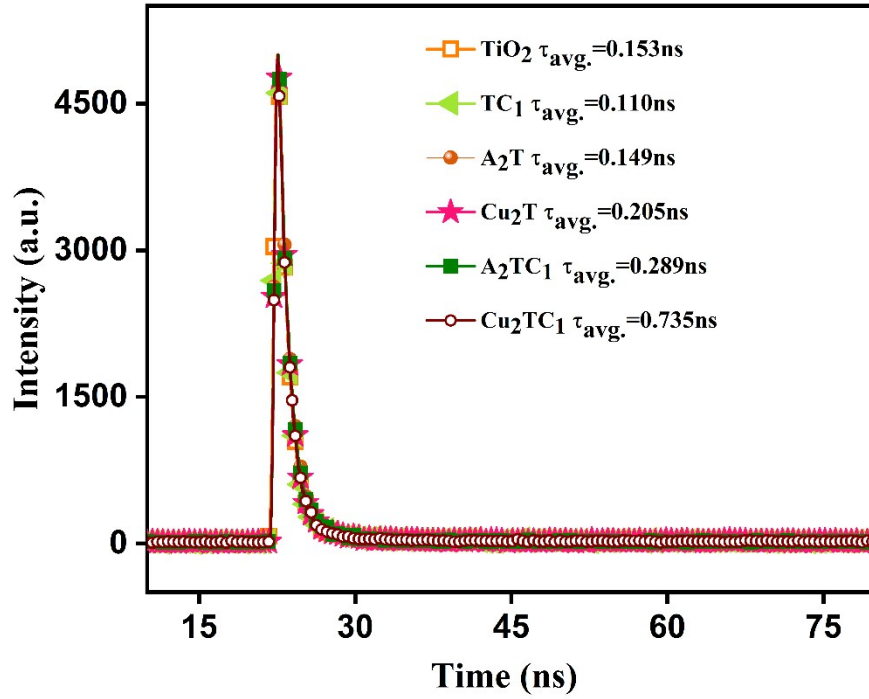

Fig. S4: TRPL decay profile of different prepared composites

| <b>Samples</b>                      | <b>A</b>      | <b>T1</b>    | <b>T2</b>    | <b>T3</b>    | <b>Chi Sq.</b> | <b><math>\tau_{avg.}(ns)</math></b> |
|-------------------------------------|---------------|--------------|--------------|--------------|----------------|-------------------------------------|
| <b>TiO<sub>2</sub></b>              | <b>25.746</b> | <b>1.103</b> | <b>7.659</b> | <b>0.144</b> | <b>0.944</b>   | <b>0.153</b>                        |
| <b>TC<sub>1</sub></b>               | <b>21.325</b> | <b>0.052</b> | <b>0.110</b> | <b>0.110</b> | <b>1.609</b>   | <b>0.110</b>                        |
| <b>A<sub>2</sub>T</b>               | <b>23.465</b> | <b>2.115</b> | <b>8.865</b> | <b>0.148</b> | <b>1.077</b>   | <b>0.149</b>                        |
| <b>Cu<sub>2</sub>T</b>              | <b>25.699</b> | <b>0.210</b> | <b>1.139</b> | <b>0.201</b> | <b>1.102</b>   | <b>0.205</b>                        |
| <b>A<sub>2</sub>TC<sub>1</sub></b>  | <b>21.321</b> | <b>2.760</b> | <b>2.773</b> | <b>0.092</b> | <b>1.064</b>   | <b>0.289</b>                        |
| <b>Cu<sub>2</sub>TC<sub>1</sub></b> | <b>24.227</b> | <b>0.744</b> | <b>0.744</b> | <b>0.153</b> | <b>1.050</b>   | <b>0.735</b>                        |

Table S1: Fluorescence Lifetime Parameters of various synthesized composites.

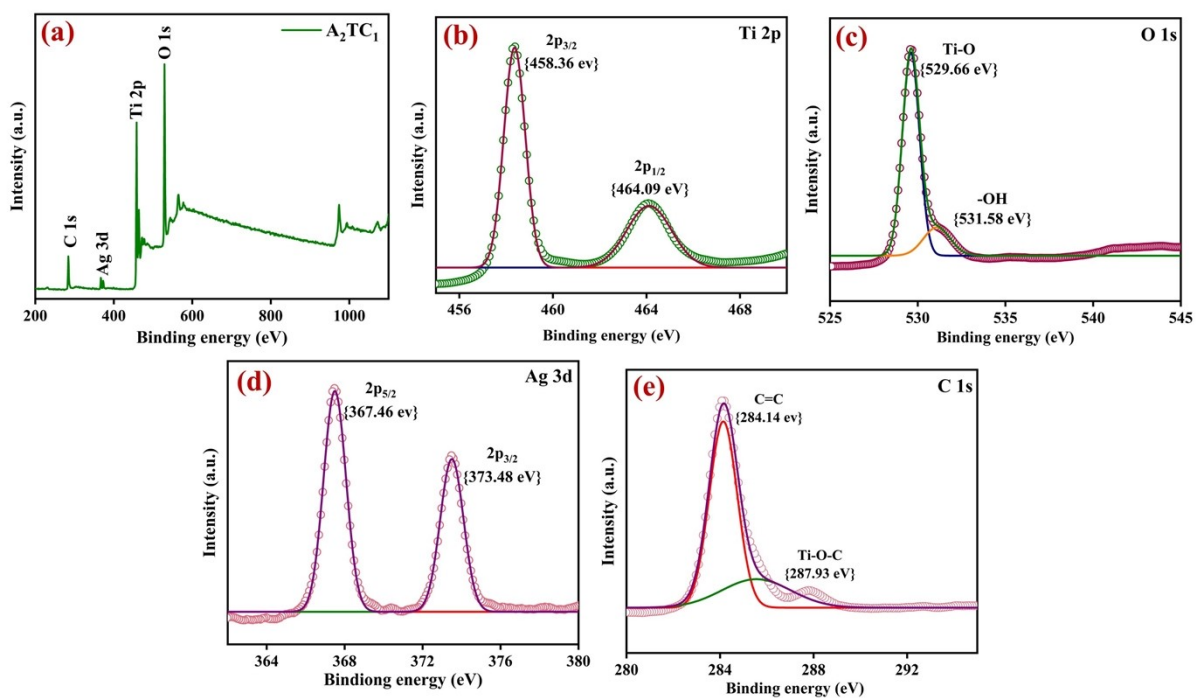

**Fig. S5:** XPS spectrum of  $A_2TC_1$  composite; (a) elemental survey spectrum, (b) Ti 2p, (c) O 1s, (d) Ag 3d, (e) C 1s

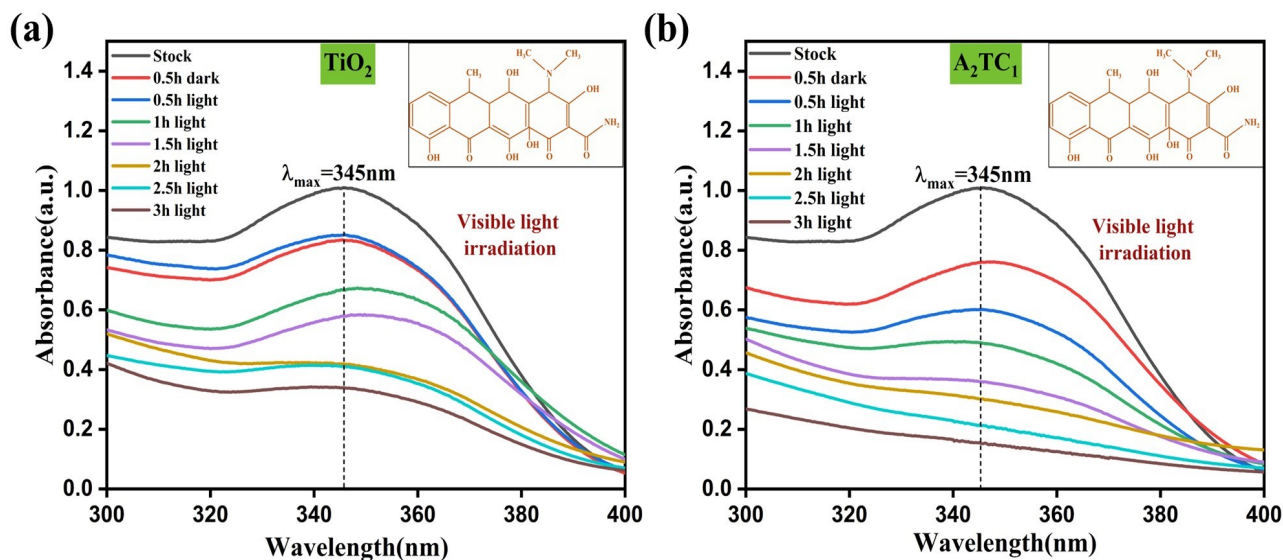

**Fig. S6:** (a) The absorbance spectra of doxycycline during photocatalytic degradation under visible light by (a) bare  $TiO_2$ , (b)  $A_2TC_1$  composite

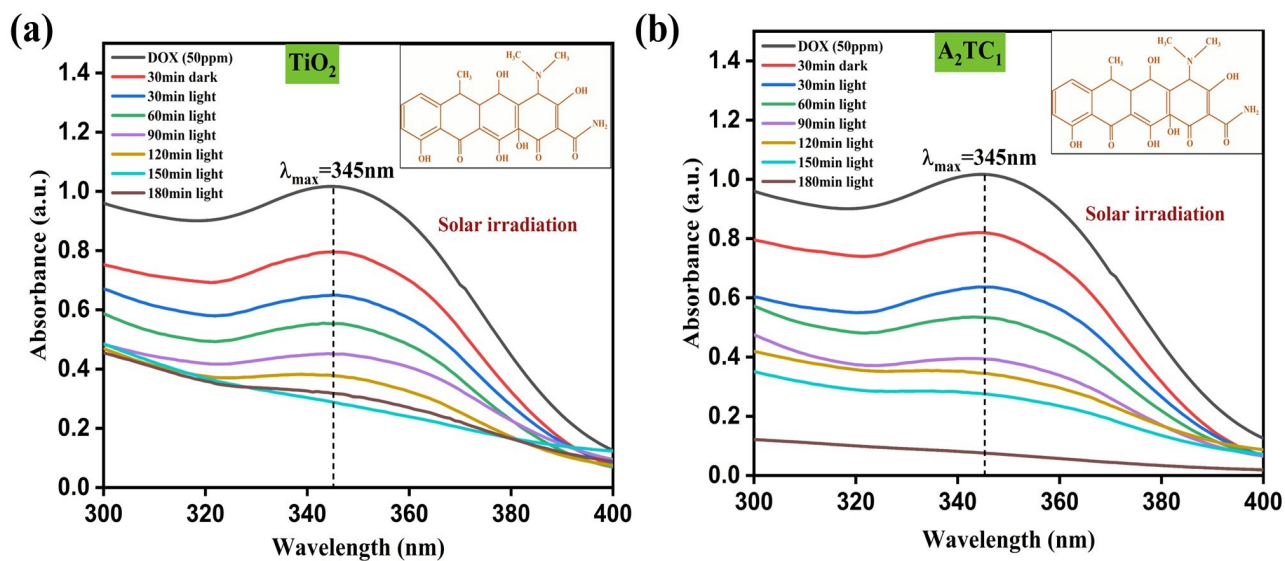

**Fig. S7:** (a) The absorbance spectra of doxycycline during photocatalytic degradation under solar light by (a) bare  $\text{TiO}_2$ , (b)  $\text{A}_2\text{TC}_1$  composite

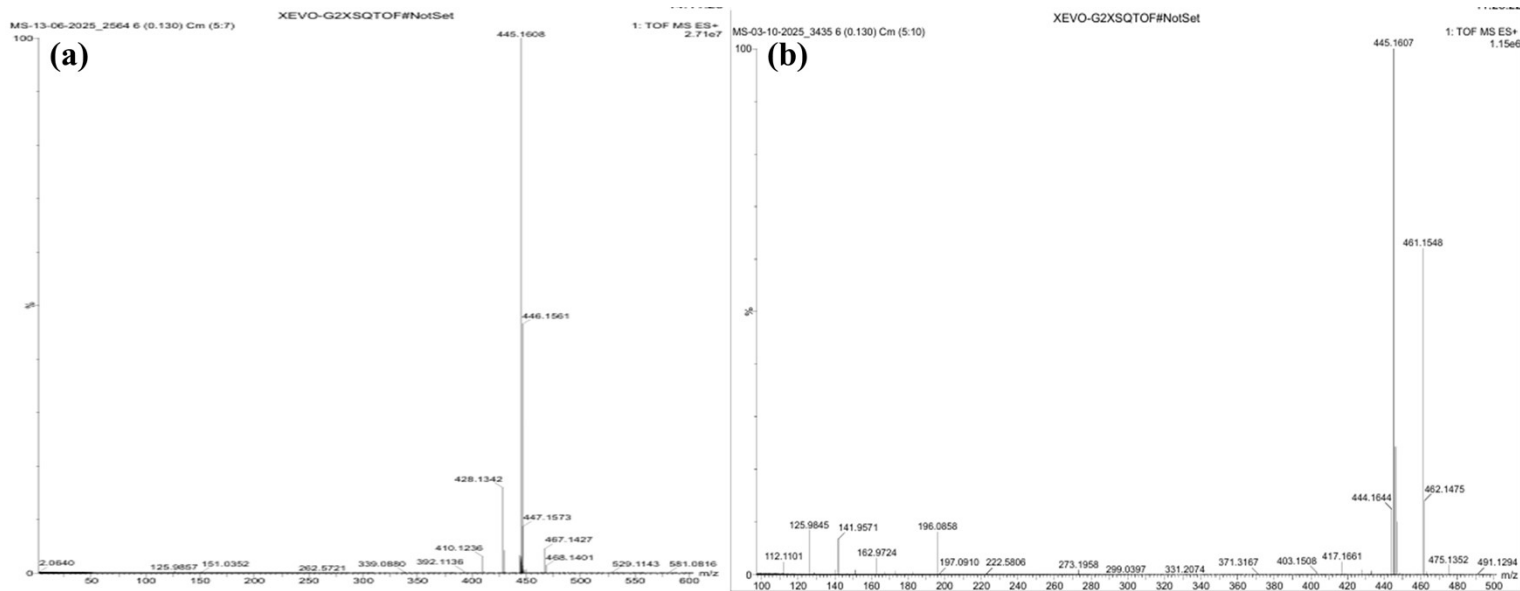

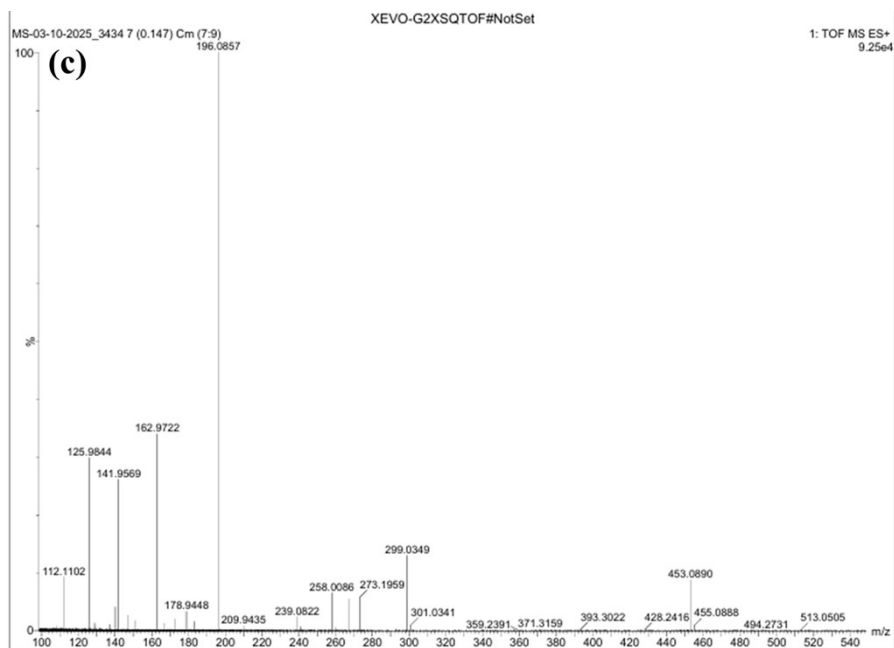

**Fig. S8:** HR-MS chromatograms and intermediates formed during photocatalytic degradation of doxycycline (a) before degradation, (b) after 90 minutes, (c) after 180 minutes
